# Supplementary material for: Change in Municipality-Level Health-Related Social Capital and Depressive Symptoms: Ecological and 5-Year Repeated Cross-Sectional Study from the JAGES
Source: MDPI journal article supplement (doi:10.3390/ijerph16112038), 2019-06-08
Supplement: s1 [file s1]

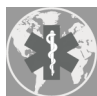

Article

# Change in Municipality-Level Health-Related Social Capital and Depressive Symptoms: Ecological and 5-Year Repeated Cross-Sectional Study from the JAGES

Ryota Watanabe, Katsunori Kondo, Tami Saito, Taishi Tsuji, Takahiro Hayashi, Takaaki Ikeda and Tokunori Takeda

**Table S1.** Health-related social capital (SC) 5-year change by using sampling methods.

|                                                                             | Complete enumeration survey ( $n = 10$ ) |         |      |     | random sampling ( $n = 34$ ) |         |          |     | $p$<br>value |
|-----------------------------------------------------------------------------|------------------------------------------|---------|------|-----|------------------------------|---------|----------|-----|--------------|
|                                                                             | Minimum                                  | Maximum | Mean | SD  | Minimum                      | Maximum | Mea<br>n | SD  |              |
| % Change in <sup>b</sup> depressive symptoms <sup>a</sup>                   | −9.7                                     | −5.1    | −7.7 | 1.4 | −11.9                        | −2.7    | −7.2     | 2.2 | 0.496        |
| % Change in <sup>b</sup> volunteer group ( $\geq 1$ per month)              | 2.0                                      | 8.0     | 4.4  | 1.9 | 0.5                          | 7.4     | 4.3      | 1.7 | 0.845        |
| % Change in <sup>b</sup> sports group ( $\geq 1$ per month)                 | 2.8                                      | 10.1    | 6.2  | 2.1 | −1.0                         | 10.5    | 6.5      | 2.6 | 0.711        |
| % Change in <sup>b</sup> hobby group ( $\geq 1$ per month)                  | −1.4                                     | 3.3     | 0.5  | 1.4 | −7.2                         | 5.8     | −0.2     | 3.1 | 0.445        |
| % Change in <sup>b</sup> volunteer group ( $\geq 1$ per week)               | 0.5                                      | 5.9     | 2.1  | 1.6 | −0.9                         | 5.7     | 2.1      | 1.4 | 0.909        |
| % Change in <sup>b</sup> sports group ( $\geq 1$ per week)                  | 1.1                                      | 5.7     | 4.3  | 1.4 | −0.8                         | 8.0     | 4.7      | 2.1 | 0.572        |
| % Change in <sup>b</sup> hobby group ( $\geq 1$ per week)                   | −2.3                                     | 3.0     | 0.2  | 1.8 | −6.9                         | 4.0     | −0.5     | 2.5 | 0.415        |
| % Change in <sup>b</sup> frequency of meeting friends ( $\geq 1$ per month) | −2.8                                     | 2.9     | −1.0 | 1.6 | −6.6                         | 3.2     | −1.3     | 2.6 | 0.779        |
| % Change in <sup>b</sup> receiving emotional social support                 | 0.1                                      | 2.2     | 1.2  | 0.6 | −1.6                         | 3.3     | 1.0      | 1.2 | 0.647        |
| % Change in <sup>b</sup> providing emotional social support                 | 0.2                                      | 3.0     | 1.3  | 0.8 | −2.1                         | 4.1     | 1.3      | 1.6 | 0.969        |
| % Change in <sup>b</sup> receiving instrumental social support              | −1.1                                     | 1.2     | 0.4  | 0.7 | −1.4                         | 3.7     | 0.9      | 1.1 | 0.168        |
| % Change in <sup>b</sup> providing instrumental social support              | −3.9                                     | −1.0    | −2.3 | 0.9 | −6.2                         | 1.0     | −1.6     | 1.4 | 0.167        |

|                                            |       |      |      |     |       |      |      |     |       |
|--------------------------------------------|-------|------|------|-----|-------|------|------|-----|-------|
| Change in <sup>c</sup> civic participation | 6.3   | 17.1 | 11.1 | 3.9 | −6.3  | 20.8 | 10.5 | 5.8 | 0.754 |
| Change in <sup>c</sup> social cohesion     | −10.8 | −0.7 | −6.4 | 2.9 | −13.3 | 6.3  | −2.0 | 4.8 | 0.015 |
| Change in <sup>c</sup> reciprocity         | 0.4   | 6.1  | 2.9  | 1.5 | −3.4  | 10.0 | 3.2  | 3.1 | 0.847 |

All factors were adjusted for age using

direct methods

SD: Standard deviation

<sup>a</sup> Depressive symptoms were defined as the prevalence of Geriatrics Depression

Scale ≥5 points

<sup>b</sup> Percentage of 2016

subtracted from 2010

<sup>c</sup> Value percentage of 2016 subtracted

from 2010

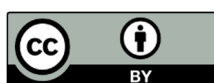

© 2019 by the authors. Licensee MDPI, Basel, Switzerland. This article is an open access article distributed under the terms and conditions of the Creative Commons Attribution (CC BY) license (<http://creativecommons.org/licenses/by/4.0/>).
